# Supplementary material for: Clinical Characteristics of Atrial Flutter and Its Response to Pharmacological Cardioversion with Amiodarone in Comparison to Atrial Fibrillation
Source: MDPI journal article supplement (doi:10.3390/jcm12134262), 2023-06-25
Supplement: s1 [file s1]

**Supplementary Table S1** Different demographic and clinical variables in the cohort of patients with atrial flutter depending on the successful termination of arrhythmia

| Variable                                    | Return of sinus<br>rhythm<br>N=180 | Persistence of arrhythmia<br>upon discharge<br>N=42 | P-value |
|---------------------------------------------|------------------------------------|-----------------------------------------------------|---------|
| Male sex                                    | 116 (64.4%)                        | 29 (69.1%)                                          | 0.573   |
| Age, years                                  | 67.1 ± 11.9                        | 68.3 ± 10.3                                         | 0.875   |
| Weight, kg                                  | 86.7 ± 21.5                        | 84.2 ± 18.2                                         | 0.713   |
| Hospitalization time,<br>days               | 3.3 ± 2.4                          | 2.8 ± 2.4                                           | 0.058   |
| Duration of AFL<br>episode, hours           | 48 (15; 168)                       | 72 (49; 120)                                        | 0.755   |
| Duration of<br>episode >48h                 | 73 (65.8%)                         | 22 (75.9%)                                          | 0.300   |
| Persistent AFL                              | 61 (51.7%)                         | 13 (44.8%)                                          | 0.508   |
| Heart rate, bpm                             | 113.4±37.2                         | 123.1 ± 43.7                                        | 0.309   |
| Heart rate >130 bpm                         | 60 (35.3%)                         | 15 (41.7%)                                          | 0.470   |
| EHRA class                                  | 2 (2; 3)                           | 3 (1; 3)                                            | 0.324   |
| CHA <sub>2</sub> DS <sub>2</sub> -VASc, pts | 3 (2; 4)                           | 3 (1; 5)                                            | 0.714   |
| Arterial hypertension                       | 123 (73.7%)                        | 28 (77.8%)                                          | 0.607   |
| Diabetes mellitus                           | 48 (28.9%)                         | 15 (41.7%)                                          | 0.134   |
| CAD/PAD                                     | 54 (32.1%)                         | 14 (37.8%)                                          | 0.505   |
| Former TIA/stroke                           | 18 (10.8%)                         | 3 (8.3%)                                            | 0.662   |
| History of PVI                              | 19 (11.2%)                         | 1 (2.8%)                                            | 0.120   |
| LVEF, %                                     | 47.8 ± 12.4                        | 44.4 ± 11.9                                         | 0.042   |
| LVEF <50%                                   | 54 (35.3%)                         | 18 (54.6%)                                          | 0.039   |
| LAd, mm                                     | 43.2 ± 6                           | 44.6 ± 6.3                                          | 0.497   |
| LAd >40 mm                                  | 114 (77.6%)                        | 25 (78.1%)                                          | 0.944   |

|                                         |             |             |       |
|-----------------------------------------|-------------|-------------|-------|
| TnT >0.014 pg/mL                        | 44 (49.4%)  | 19 (70.4%)  | 0.056 |
| SCr, mg/dL                              | 1.2±0.9     | 1.1±0.7     | 0.493 |
| eGFR, mL/min                            | 67.7 ± 18.4 | 69.4 ± 19.1 | 0.542 |
| eGFR <60 mL/min per 1.73 m <sup>2</sup> | 52 (31.7%)  | 10 (26.3%)  | 0.516 |
| Potassium level, mEq/L                  | 4.4 ± 0.4   | 4.3 ± 0.5   | 0.136 |
| WBC ×1000/μL                            | 8.1 ± 3     | 8.3 ± 2.3   | 0.206 |
| Hemoglobin, g/dL                        | 14 ± 2      | 14.1 ± 1.5  | 0.995 |
| TSH, mIU/L                              | 2.8 ± 5.6   | 1.6 ± 1.1   | 0.101 |

AfI- atrial flutter; AF – atrial fibrillation; bpm- beats per minute; eGFR – estimated glomerular filtration rate; EHRA – European Heart Rhythm Association; CAD – coronary artery disease; LAd- left atrial diameter; LVEF – left ventricular ejection fraction; PAD – peripheral artery disease; TIA – transient ischemic attack; PVI – pulmonary vein isolation; TnT- troponin T; SCr – serum creatinine concentration; WBC – white blood cell count; TSH – thyroid-stimulating hormone
